# Supplementary material
Source: publisher site journal article supplement (https://en-cdn.bio-protocol.org/attached/file/20210425/4016%20Supplementary%20Script%20s1.docx)
Supplement: Supplementary file 1 [file 4016%20Supplementary%20Script%20s1.docx]

**Supplementary Script**

*InputBox, Layer, Layers, Enter number of layers,*

*InputBox, Height, Original Height, Enter original height,*

*InputBox, Increment, Height Increment, Enter Height increment per layer(µm),*

*keyin=0*

*Loop %layer%*

*{*

*ControlClick, x557 y285, Dimatix Drop Manager,,,,*

*sleep 1000*

*setkeydelay,5*

*loop 20*

*{*

*send {BS}*

*send {Del}*

*}*

*setkeydelay,100*

*send, %Height%*

*sleep 1000*

*Height:=Height+Increment*

*sleep 1000*

*ControlClick, x706 y550, Dimatix Drop Manager,,,,*

*Sleep 2000*

*ControlClick, x607 y533, Print Preview *** Using Printing Origin ***,,,,*

*sleep 1000*

*window=1*

*while window==1*

*{*

*IfWinExist, Waiting to print...*

*{*

*window :=1*

*}*

*else*

*{*

*window :=0*

*}*

*}*

*READY:= 0*

*while READY == 0*

*{*

*X := 695*

*Y := 560*

*WinActivate, Dimatix Drop Manager*

*sleep 3000*

*PixelGetColor, color, X, Y,RGB*

*ifEqual, color, 0x52B54A*

*{*

*READY := 1*

*}*

*else*

*{*

*READY := 0*

*}*

*}*

*}*

*Esc::ExitApp*
